# Supplementary material for: Long-term effectiveness and moderators of a web-based tailored intervention for cancer survivors on social and emotional functioning, depression, and fatigue: randomized controlled trial
Source: PubMed Central journal article supplement (PMC5671537; doi:10.1007/s11764-017-0625-0), 2017-07-11
Supplement: 11764_2017_625_MOESM3_ESM.pdf [file 11764_2017_625_MOESM3_ESM.pdf]

### ONLINE RESOURCE 3

*Article title:* Long-term effectiveness and moderators of a web-based tailored intervention for cancer survivors on social and emotional functioning, depression, and fatigue: randomized controlled trial

*Journal:* Journal of Cancer Survivorship

*Authors:* Roy A. Willems, Ilse Mesters, Lilian Lechner, Iris M. Kanera, Catherine A.W. Bolman

*Contact:* Roy Willems, Faculty of Psychology and Educational Sciences, Open University of the Netherlands, P.O. Box 2960, 6401DL, Heerlen, The Netherlands

*E-mail:* roy.willems@ou.nl

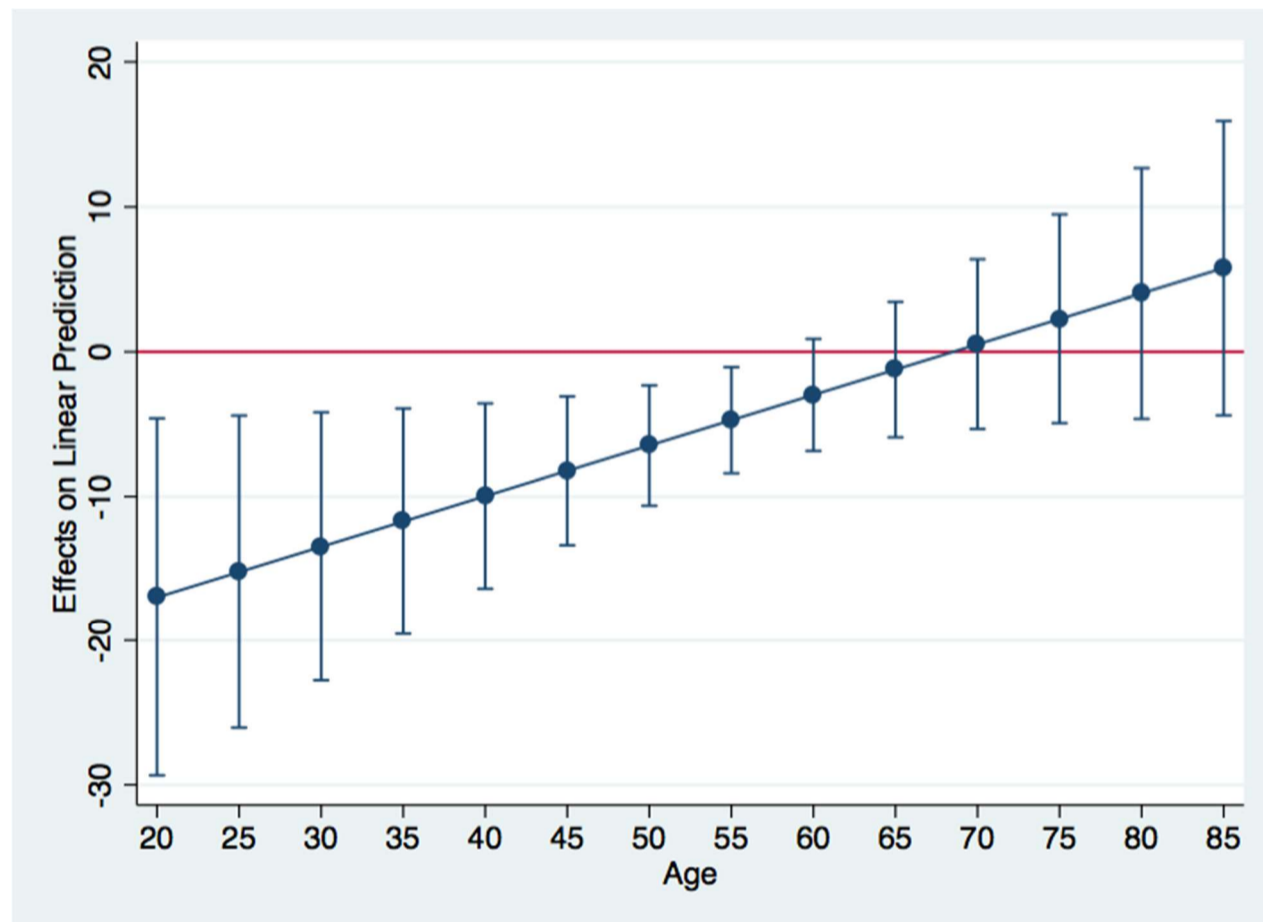

Figure 1. Average marginal effects of condition on fatigue at 6 months from baseline for different ages. Vertical bars represent the 95% CI.

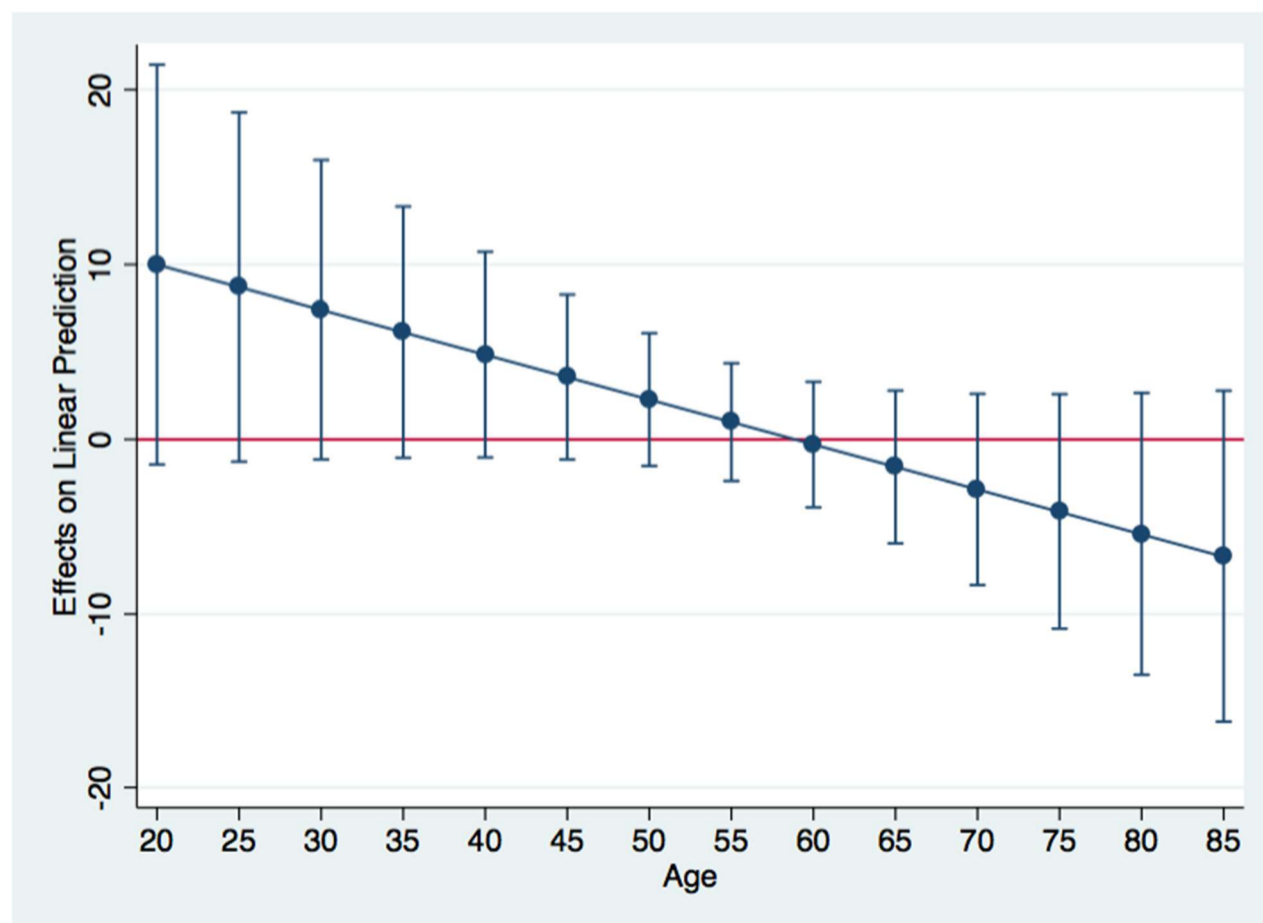

Figure 2. Average marginal effects of condition on social functioning at 12 months from baseline for different ages. Vertical bars represent the 95% CI.
