# Supplementary material for: Long-term effectiveness and moderators of a web-based tailored intervention for cancer survivors on social and emotional functioning, depression, and fatigue: randomized controlled trial
Source: Springer Nature journal article supplement (doi:10.1007/s11764-017-0625-0), 2017-07-11
Supplement: MOESM4 [file 13295112]

## ONLINE RESOURCE 4

*Article title:* Long-term effectiveness and moderators of a web-based tailored intervention for cancer survivors on social and emotional functioning, depression, and fatigue: randomized controlled trial

*Journal:* Journal of Cancer Survivorship

*Authors:* Roy A. Willems, Ilse Mesters, Lilian Lechner, Iris M. Kanera, Catherine A.W. Bolman

*Contact:* Roy Willems, Faculty of Psychology and Educational Sciences, Open University of the Netherlands, P.O. Box 2960, 6401DL, Heerlen, The Netherlands

*E-mail:* roy.willems@ou.nl

Means and SDs for fatigue, depression, and social functioning by moderators

|                                                |    | Control  |                  | Intervention |                  |
|------------------------------------------------|----|----------|------------------|--------------|------------------|
|                                                |    | <i>n</i> | mean ± <i>SD</i> | <i>n</i>     | mean ± <i>SD</i> |
| Fatigue by age                                 |    |          |                  |              |                  |
| ≤ 56 years                                     | T0 | 107      | 69.86 ± 27.33    | 125          | 68.38 ± 25.39    |
|                                                | T2 | 101      | 66.40 ± 29.45    | 97           | 54.43 ± 25.17    |
|                                                | T3 | 96       | 62.53 ± 27.82    | 88           | 60.38 ± 30.11    |
| ≥ 57 years                                     | T0 | 124      | 61.18 ± 28.52    | 106          | 60.05 ± 27.10    |
|                                                | T2 | 120      | 57.88 ± 26.52    | 91           | 57.47 ± 28.34    |
|                                                | T3 | 115      | 57.57 ± 27.06    | 80           | 57.14 ± 28.12    |
| Depression by treatment type                   |    |          |                  |              |                  |
| <i>Surgery only</i>                            | T0 | 31       | 4.32 ± 4.04      | 28           | 3.14 ± 3.08      |
|                                                | T2 | 29       | 3.90 ± 3.76      | 25           | 3.32 ± 3.66      |
|                                                | T3 | 26       | 3.54 ± 4.15      | 21           | 3.19 ± 3.74      |
| <i>Chemotherapy ± surgery</i>                  | T0 | 58       | 3.43 ± 3.19      | 69           | 3.52 ± 2.95      |
|                                                | T2 | 58       | 3.81 ± 3.94      | 53           | 2.55 ± 3.03      |
|                                                | T3 | 54       | 3.43 ± 3.73      | 44           | 2.84 ± 2.84      |
| <i>Radiotherapy ± surgery</i>                  | T0 | 33       | 3.91 ± 3.67      | 47           | 3.91 ± 3.63      |
|                                                | T2 | 31       | 3.19 ± 3.43      | 43           | 2.67 ± 3.31      |
|                                                | T3 | 30       | 3.20 ± 3.31      | 39           | 2.21 ± 2.69      |
| <i>Chemotherapy and radiotherapy ± surgery</i> | T0 | 109      | 3.06 ± 3.32      | 87           | 3.78 ± 3.37      |
|                                                | T2 | 103      | 3.37 ± 3.61      | 67           | 2.96 ± 2.71      |
|                                                | T3 | 101      | 3.03 ± 3.21      | 64           | 3.28 ± 2.99      |
| Social functioning by gender                   |    |          |                  |              |                  |
| <i>Men</i>                                     | T0 | 45       | 85.19 ± 21.97    | 48           | 81.94 ± 18.78    |
|                                                | T2 | 42       | 88.10 ± 21.87    | 36           | 94.44 ± 14.36    |
|                                                | T3 | 41       | 90.24 ± 19.36    | 29           | 90.80 ± 18.68    |
| <i>Women</i>                                   | T0 | 186      | 81.27 ± 22.67    | 183          | 79.23 ± 21.61    |
|                                                | T2 | 179      | 87.06 ± 18.91    | 152          | 89.04 ± 17.27    |
|                                                | T3 | 170      | 81.35 ± 18.89    | 139          | 87.77 ± 19.72    |
| Social functioning by educational level        |    |          |                  |              |                  |
| <i>Low</i>                                     | T0 | 97       | 77.66 ± 24.87    | 76           | 78.95 ± 19.12    |
|                                                | T2 | 93       | 86.38 ± 19.50    | 63           | 88.36 ± 17.87    |
|                                                | T3 | 87       | 87.55 ± 18.19    | 52           | 83.33 ± 20.87    |
| <i>Medium</i>                                  | T0 | 70       | 86.19 ± 18.16    | 76           | 80.26 ± 20.85    |
|                                                | T2 | 65       | 84.36 ± 20.60    | 64           | 89.58 ± 17.44    |
|                                                | T3 | 61       | 85.79 ± 21.48    | 62           | 89.78 ± 20.99    |
| <i>High</i>                                    | T0 | 64       | 84.11 ± 22.31    | 79           | 80.17 ± 23.12    |
|                                                | T2 | 63       | 91.53 ± 17.68    | 61           | 92.35 ± 15.08    |
|                                                | T3 | 63       | 90.48 ± 17.38    | 54           | 91.36 ± 15.44    |

T0 = baseline, T2 = 6 months from baseline, T3 = 12 months from baseline
