# Supplementary material for: Long-term effectiveness and moderators of a web-based tailored intervention for cancer survivors on social and emotional functioning, depression, and fatigue: randomized controlled trial
Source: J Cancer Surviv. 2017 Jul 11;11(6):691–703. doi: 10.1007/s11764-017-0625-0 (PMC5671537; doi:10.1007/s11764-017-0625-0)
Supplement: Supplementary file 2 — (PDF 399 kb). [file 11764_2017_625_MOESM2_ESM.pdf]

ONLINE RESOURCE 2

Article title: Long-term effectiveness and moderators of a web-based tailored intervention for cancer survivors on social and emotional functioning, depression, and fatigue: randomized controlled trial

Journal: Journal of Cancer Survivorship

Authors: Roy A. Willems, Ilse Mesters, Lilian Lechner, Iris M. Kanera, Catherine A.W. Bolman

Contact: Roy Willems, Faculty of Psychology and Educational Sciences, Open University of the Netherlands, P.O. Box 2960, 6401DL, Heerlen, The Netherlands

E-mail: roy.willems@ou.nl

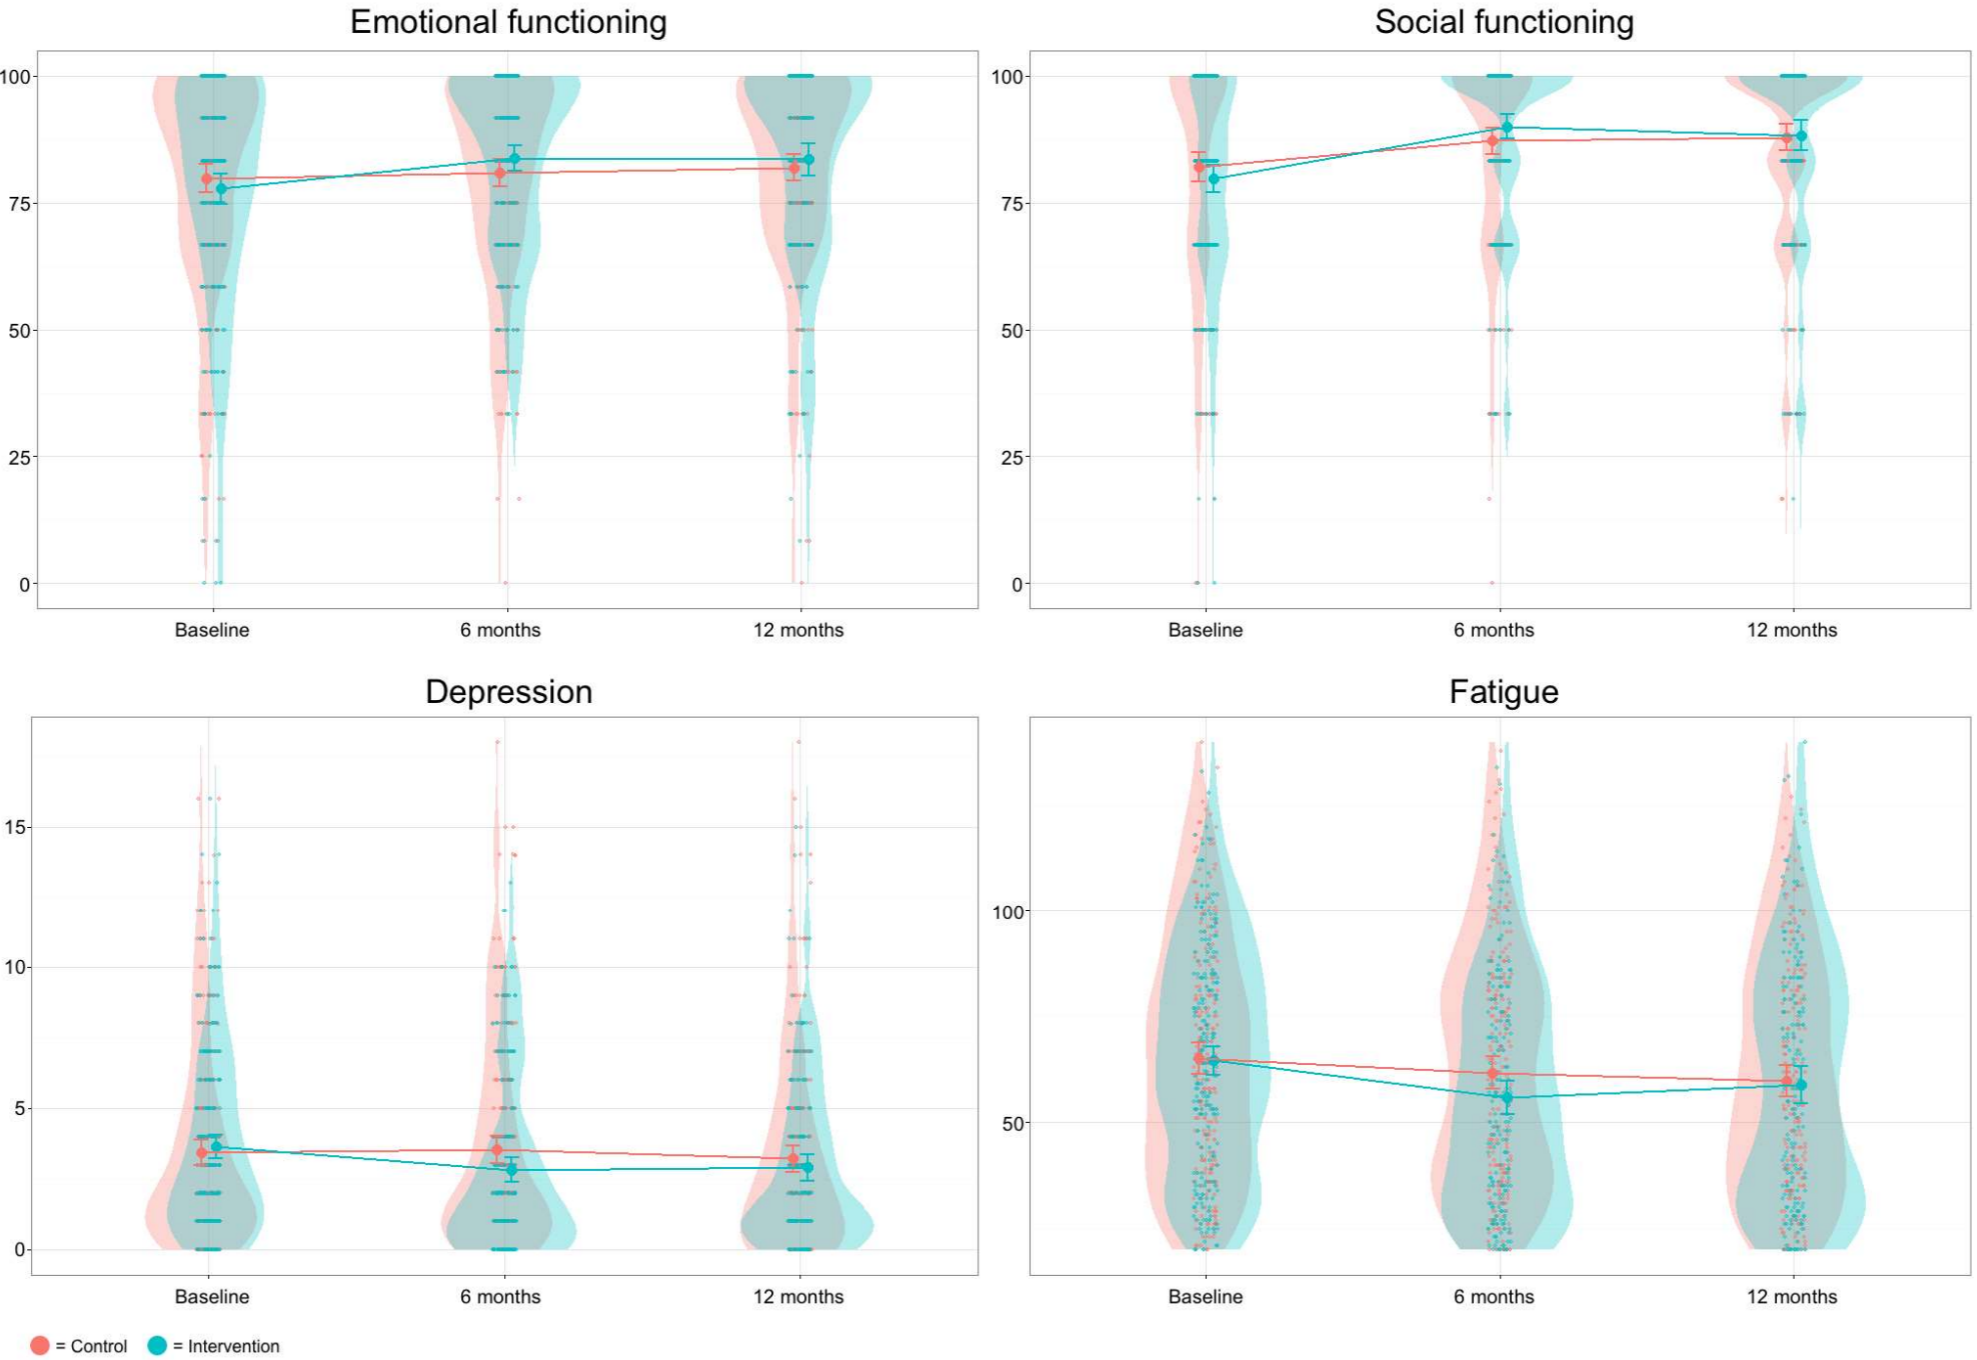

Violin plots with individual data points of the outcomes at baseline and 6 and 12 months after baseline. Vertical bars represent the 95% CI of the mean. The colored areas represent the estimated kernel density. Violin plots were made in R 3.2.3 with the function `dlvPlot` of the package `userfriendlyscience`.
